# Supplementary material
Source: publisher site journal article supplement (http://kjim.org/upload/media/kjim-2020-605-app1.pdf)
Supplement: Supplementary file 1 [file kjim-2020-605-app1.pdf]

**Appendix 1.** Search strategy.

| S.No | Search terms                                                                                                                                                                                       | Hits    |
|------|----------------------------------------------------------------------------------------------------------------------------------------------------------------------------------------------------|---------|
| 1    | exp osteoarthritis/                                                                                                                                                                                | 189311  |
| 2    | osteoarthr\$.tw.                                                                                                                                                                                   | 170288  |
| 3    | osteoarthritis.mp.                                                                                                                                                                                 | 228132  |
| 4    | degenerative arthritis.tw.                                                                                                                                                                         | 2709    |
| 5    | 1 or 2 or 3 or 4                                                                                                                                                                                   | 244731  |
| 6    | hydroxychloroquine.mp.                                                                                                                                                                             | 30323   |
| 7    | plaquenil.mp.                                                                                                                                                                                      | 1398    |
| 8    | 6 or 7                                                                                                                                                                                             | 30358   |
| 9    | ((randomized controlled trial or controlled clinical trial).pt. or randomized.ab. or placebo.ab. or drug therapy.fs. or randomly.ab. or trial.ab. or groups.ab.) not (exp animals/ not humans.sh.) | 4639871 |
| 10   | 5 and 8 and 9                                                                                                                                                                                      | 40      |
| 11   | remove duplicates from 10                                                                                                                                                                          | 39      |

Osteoarthritis terms

Hydroxychloroquine terms

Study design terms

Final search hits
